# Supplementary material for: What happens when the lights are left on? Transcriptomic and phenotypic habituation to light pollution
Source: PubMed Central journal article supplement — iScience. 2024 Jan 12;27(2):108864. doi: 10.1016/j.isci.2024.108864 (PMC10839644; doi:10.1016/j.isci.2024.108864), 2024-01-12
Supplement: mmc1.pdf [file mmc1.pdf]

**iScience, Volume 27**

**Supplemental information**

**What happens when the lights  
are left on? Transcriptomic and phenotypic  
habituation to light pollution**

**Valentina J. Alaasam, Cassandra Hui, Johnathan Lomas, Stephen M. Ferguson, Yong  
Zhang, Won Cheol Yim, and Jenny Q. Ouyang**

Supplementary materials for “*What happens when the lights are left on? Transcriptomic and phenotypic habituation to light pollution*”

Authors: Alaasam VJ, Hui C, Lomas J, Ferguson SM, Zhang Y, Cheol Yim W, Ouyang JQ

**Table S1:** Generalized linear mixed-effect model to test whether behavioral responses of naïve birds to ALAN (count of active minutes per night) depend on duration of activity / time of year animals were exposed (stage). There was no significant effect of sex, so it was dropped from the final model. Fixed effects include day (integer) and the interaction of ALAN (factor) and stage (factor), with individual as a random effect to account for repeated measures and a Poisson distribution.

| Predictor    | IRR <sup>1</sup> | SE    | CI(95%)    | p            |
|--------------|------------------|-------|------------|--------------|
| Day          | 1.00             | 0.002 | 1.00, 1.00 | 0.433        |
| ALAN         | 2.31             | 0.919 | 1.06, 5.04 | <b>0.035</b> |
| ALAN * stage |                  |       |            |              |
| 0 * 3        | 0.87             | 0.145 | 0.63, 1.21 | 0.407        |
| 1 * 3        | 1.27             | 0.539 | 0.55, 2.92 | 0.579        |

<sup>1</sup> IRR = Incidence Rate Ratio

**Table S2:** Linear mixed-effect models to test whether oxidative responses of naïve birds to ALAN depend on duration of captivity or time of year animals were exposed. Fixed effects include sex (factor), ALAN treatment group (factor) and day (integer), with individual bird as a random effect to account for repeated measures. There was no significant interaction of ALAN and day, so the interactive term was dropped from the final model. Results of models using a combined stress index as well as individual biomarkers (oxy absorbance and dROMs).

| Predictor | Stress Index |       |             |              | Oxy Absorbance |       |           |       | dROMs   |       |             |       |
|-----------|--------------|-------|-------------|--------------|----------------|-------|-----------|-------|---------|-------|-------------|-------|
|           | $\beta$      | SE    | CI (95%)    | p            | $\beta$        | SE    | CI (95%)  | p     | $\beta$ | SE    | CI (95%)    | p     |
| Sex       | 0.79         | 0.342 | 0.07, 1.5   | <b>0.033</b> | -33            | 19.6  | -73, 8.1  | 0.110 | 0.51    | 0.815 | -1.2, 2.2   | 0.539 |
| Day       | -0.02        | 0.017 | -0.06, 0.01 | 0.166        | 0.19           | 0.635 | -1.1, 1.5 | 0.768 | -0.06   | 0.039 | -0.14, 0.02 | 0.134 |
| ALAN      | -0.09        | 0.288 | -0.67, 0.48 | 0.748        | -2.0           | 10.7  | -24, 19   | 0.850 | -0.25   | 0.657 | -1.6, 1.1   | 0.704 |

**Table S3.** Gene annotation analysis of down- and upregulated genes for 1) naïve ALAN exposure compared to acclimation period (pre-ALAN); 2) Recovery 11 weeks post-exposure ALAN compared to during naïve exposures, and 3) Secondary re-exposure compared to naïve exposure. Gene annotation analysis conducted in Metascape [4]. Only top 20 results are shown, and all *q*-values of less than 0.05 are bolded. Full output available on GitHub (<https://github.com/valaasam>)

|                                | Direction               | Category                                       | Name                                                                     | # of Genes | <i>p</i>       | <i>q</i>       |
|--------------------------------|-------------------------|------------------------------------------------|--------------------------------------------------------------------------|------------|----------------|----------------|
| Naïve Exposure                 | Down-regulated          | Reactome Gene Sets                             | Cellular response to stress                                              | 15         | < 0.001        | < <b>0.001</b> |
|                                |                         |                                                | Neddylation                                                              | 8          | < 0.001        | <b>0.004</b>   |
|                                |                         |                                                | Golgi Associated Vesicle Biogenesis                                      | 4          | < 0.001        | <b>0.044</b>   |
|                                |                         |                                                | Oxygen-dependent proline hydroxylation of Hypoxia-inducible Factor Alpha | 4          | < 0.001        | 0.074          |
|                                |                         | GO Biological Processes                        | Hemopoiesis                                                              | 11         | < 0.001        | <b>0.014</b>   |
|                                |                         |                                                | Response to peptide                                                      | 8          | < 0.001        | 0.089          |
|                                |                         |                                                | Cellular response to decreased oxygen levels                             | 5          | < 0.001        | 0.089          |
| Recovery                       | Down-regulated          | KEGG Pathway                                   | Platelet activation                                                      | 19         | < 0.001        | < <b>0.001</b> |
|                                |                         |                                                | Focal adhesion                                                           | 19         | < 0.001        | < <b>0.001</b> |
|                                |                         |                                                | Leukocyte transendothelial migration                                     | 11         | < 0.001        | < <b>0.001</b> |
|                                |                         |                                                | Thyroid hormone signaling                                                | 11         | < 0.001        | < <b>0.001</b> |
|                                |                         | WikiPathways                                   | VEGFA-VEGFR2 signaling                                                   | 22         | < 0.001        | < <b>0.001</b> |
|                                |                         |                                                | Myometrial relaxation and contraction                                    | 11         | < 0.001        | < <b>0.001</b> |
|                                |                         | Canonical Pathways                             | PID FAK                                                                  | 9          | < 0.001        | < <b>0.001</b> |
|                                |                         | Reactome Gene Sets                             | Muscle contraction                                                       | 14         | < 0.001        | < <b>0.001</b> |
|                                |                         | GO Biological Processes                        | Response to wounding                                                     | 29         | < 0.001        | < <b>0.001</b> |
|                                |                         |                                                | Actin cytoskeleton organization                                          | 28         | < 0.001        | < <b>0.001</b> |
|                                |                         |                                                | Positive regulation of cell migration                                    | 24         | < 0.001        | < <b>0.001</b> |
|                                |                         |                                                | Regulation of vesicle-mediated transport                                 | 23         | < 0.001        | < <b>0.001</b> |
|                                |                         |                                                | Cellular response to nitrogen compound                                   | 23         | < 0.001        | < <b>0.001</b> |
|                                |                         |                                                | Regulation of kinase activity                                            | 23         | < 0.001        | < <b>0.001</b> |
|                                |                         |                                                | Circulatory system process                                               | 21         | < 0.001        | < <b>0.001</b> |
|                                |                         |                                                | Cellular response to organic cyclic compound                             | 19         | < 0.001        | < <b>0.001</b> |
|                                |                         |                                                | Regulation of cell-substrate junction organization                       | 10         | < 0.001        | < <b>0.001</b> |
|                                |                         |                                                | Actomyosin structure organization                                        | 10         | < 0.001        | < <b>0.001</b> |
|                                |                         |                                                | Release of sequestered calcium ion into cytosol                          | 8          | < 0.001        | < <b>0.001</b> |
|                                |                         |                                                | Cell-substrate junction assembly                                         | 7          | < 0.001        | < <b>0.001</b> |
| Up-regulated                   | WikiPathways            | Translation factors                            | 6                                                                        | < 0.001    | < <b>0.001</b> |                |
|                                |                         | Asparagine N-linked glycosylation              | 9                                                                        | < 0.001    | <b>0.023</b>   |                |
|                                | Reactome Gene Sets      | Hypusine synthesis from eIF5A-lysine           | 3                                                                        | < 0.001    | < <b>0.001</b> |                |
|                                |                         | Translation                                    | 33                                                                       | < 0.001    | < <b>0.001</b> |                |
|                                | GO Biological Processes | Endomembrane system organization               | 17                                                                       | < 0.001    | < <b>0.001</b> |                |
|                                |                         | Protein catabolic process                      | 16                                                                       | < 0.001    | <b>0.004</b>   |                |
|                                |                         | Ribosome biogenesis                            | 13                                                                       | < 0.001    | < <b>0.001</b> |                |
|                                |                         | Regulation of cellular amide metabolic process | 12                                                                       | < 0.001    | <b>0.033</b>   |                |
|                                |                         | Positive regulation of organelle organization  | 11                                                                       | < 0.001    | 0.058          |                |
|                                |                         | Aerobic electron transport chain               | 10                                                                       | < 0.001    | < <b>0.001</b> |                |
| Cellular component disassembly | 10                      | < 0.001                                        | <b>0.006</b>                                                             |            |                |                |

|                                           |                         |                                                |                                                                 |                |              |                |
|-------------------------------------------|-------------------------|------------------------------------------------|-----------------------------------------------------------------|----------------|--------------|----------------|
|                                           |                         |                                                | Response to oxidative stress                                    | 9              | < 0.001      | 0.074          |
|                                           |                         |                                                | Mitochondrial gene expression                                   | 8              | < 0.001      | <b>0.001</b>   |
|                                           |                         |                                                | Regulation of proteolysis involved in protein catabolic process | 8              | < 0.001      | <b>0.017</b>   |
|                                           |                         |                                                | Protein localization to organelle                               | 7              | < 0.001      | <b>0.001</b>   |
|                                           |                         |                                                | Vacuole organization                                            | 7              | < 0.001      | <b>0.022</b>   |
|                                           |                         |                                                | Protein folding                                                 | 7              | < 0.001      | 0.068          |
|                                           |                         |                                                | Regulation of ubiquitin protein ligase activity                 | 4              | < 0.001      | <b>0.003</b>   |
|                                           |                         |                                                | tRNA threonylcarbamoyladenosine metabolic process               | 3              | < 0.001      | <b>0.033</b>   |
|                                           |                         | CORUM                                          | Parvulin-associated pre-rRNP complex                            | 3              | < 0.001      | <b>0.009</b>   |
| Re-exposure                               | Down-regulated          | KEGG Pathway                                   | Regulation of actin cytoskeleton                                | 21             | < 0.001      | < <b>0.001</b> |
|                                           |                         |                                                | Platelet activation                                             | 17             | < 0.001      | < <b>0.001</b> |
|                                           |                         |                                                | Leukocyte transendothelial migration                            | 14             | < 0.001      | < <b>0.001</b> |
|                                           |                         |                                                | Oxytocin signaling pathway                                      | 14             | < 0.001      | < <b>0.001</b> |
|                                           |                         | WikiPathways                                   | VEGFA-VEGFR2 signaling pathway                                  | 22             | < 0.001      | < <b>0.001</b> |
|                                           |                         |                                                | Myometrial relaxation and contraction pathways                  | 16             | < 0.001      | < <b>0.001</b> |
|                                           |                         |                                                |                                                                 |                |              |                |
|                                           |                         | Reactome Gene Sets                             | Hemostasis                                                      | 35             | < 0.001      | < <b>0.001</b> |
|                                           |                         |                                                | GPCR downstream signaling                                       | 25             | < 0.001      | < <b>0.001</b> |
|                                           |                         |                                                | Cell-Cell communication                                         | 13             | < 0.001      | < <b>0.001</b> |
|                                           |                         |                                                | Smooth Muscle Contraction                                       | 8              | < 0.001      | < <b>0.001</b> |
|                                           |                         | GO Biological Processes                        | Actin filament-based process                                    | 35             | < 0.001      | < <b>0.001</b> |
|                                           |                         |                                                | Regulation of body fluid levels                                 | 24             | < 0.001      | < <b>0.001</b> |
|                                           |                         |                                                | Regulation of vesicle-mediated transport                        | 24             | < 0.001      | < <b>0.001</b> |
|                                           |                         |                                                | Positive regulation of cell migration                           | 24             | < 0.001      | < <b>0.001</b> |
|                                           |                         |                                                | Cell morphogenesis                                              | 23             | < 0.001      | < <b>0.001</b> |
|                                           |                         |                                                | Regulation of anatomical structure size                         | 21             | < 0.001      | < <b>0.001</b> |
|                                           |                         |                                                | Regulation of GTPase activity                                   | 21             | < 0.001      | < <b>0.001</b> |
|                                           |                         |                                                | Regulation of small GTPase mediated signal transduction         | 19             | < 0.001      | < <b>0.001</b> |
|                                           |                         |                                                | Regulation of cell morphogenesis                                | 17             | < 0.001      | < <b>0.001</b> |
| Small GTPase mediated signal transduction | 15                      |                                                | < 0.001                                                         | < <b>0.001</b> |              |                |
| Up-regulated                              | Canonical Pathways      |                                                | PID Telomerase Pathway                                          | 5              | < 0.001      | <b>0.012</b>   |
|                                           |                         |                                                |                                                                 |                |              |                |
|                                           | GO Biological Processes | Immune system development                      | 15                                                              | < 0.001        | <b>0.003</b> |                |
|                                           |                         | Histone modification                           | 11                                                              | < 0.001        | <b>0.003</b> |                |
|                                           |                         | Neural tube closure                            | 6                                                               | < 0.001        | <b>0.006</b> |                |
|                                           |                         | Chaperone cofactor-dependent protein Refolding | 4                                                               | < 0.001        | <b>0.012</b> |                |
|                                           |                         | Negative regulation of macroautophagy          | 4                                                               | < 0.001        | <b>0.016</b> |                |
|                                           |                         | Nucleocytoplasmic transport                    | 7                                                               | < 0.001        | <b>0.046</b> |                |
|                                           |                         | Heterochromatin formation                      | 4                                                               | < 0.001        | 0.052        |                |
|                                           |                         | Protein autophosphorylation                    | 6                                                               | < 0.001        | 0.071        |                |
|                                           |                         | Protein hydroxylation                          | 3                                                               | < 0.001        | 0.091        |                |
|                                           |                         | Nucleus localization                           | 3                                                               | < 0.001        | 0.091        |                |
|                                           |                         | Regulation of cell cycle process               | 11                                                              | < 0.001        | 0.100        |                |
|                                           |                         | Regulation of dephosphorylation                | 5                                                               | < 0.001        | 0.100        |                |

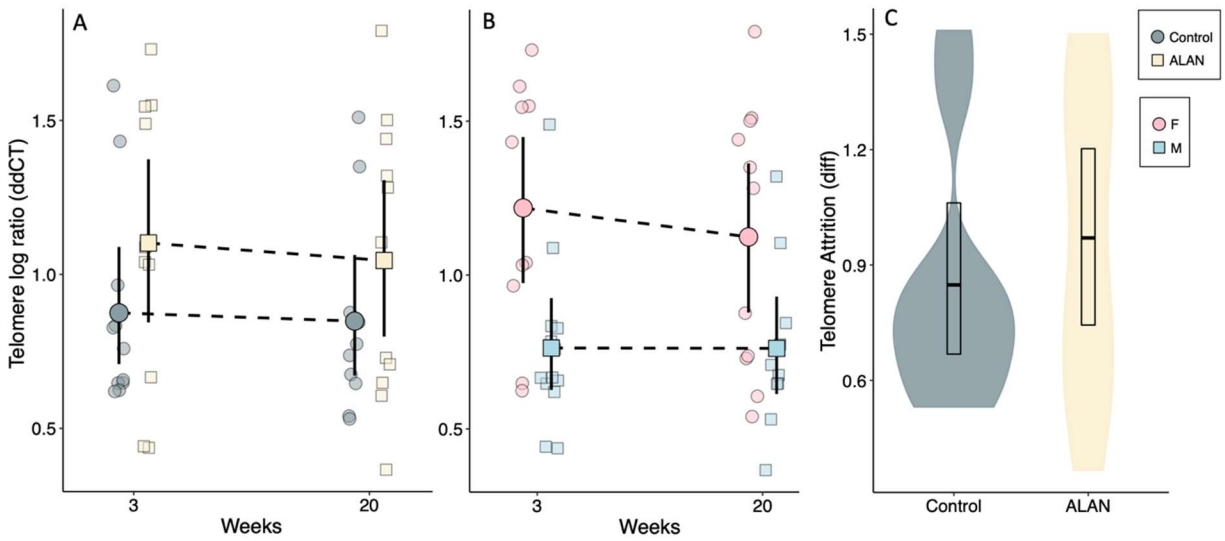

**Figure S1.** Telomere lengths did not differ between ALAN and control groups at either timepoint (A). Males consistently had shorter telomeres than females across timepoints (B). Individual changes in telomere length over time were all positive, indicating a shortening of telomeres over time, but there was no difference in degree of attrition between groups (C).

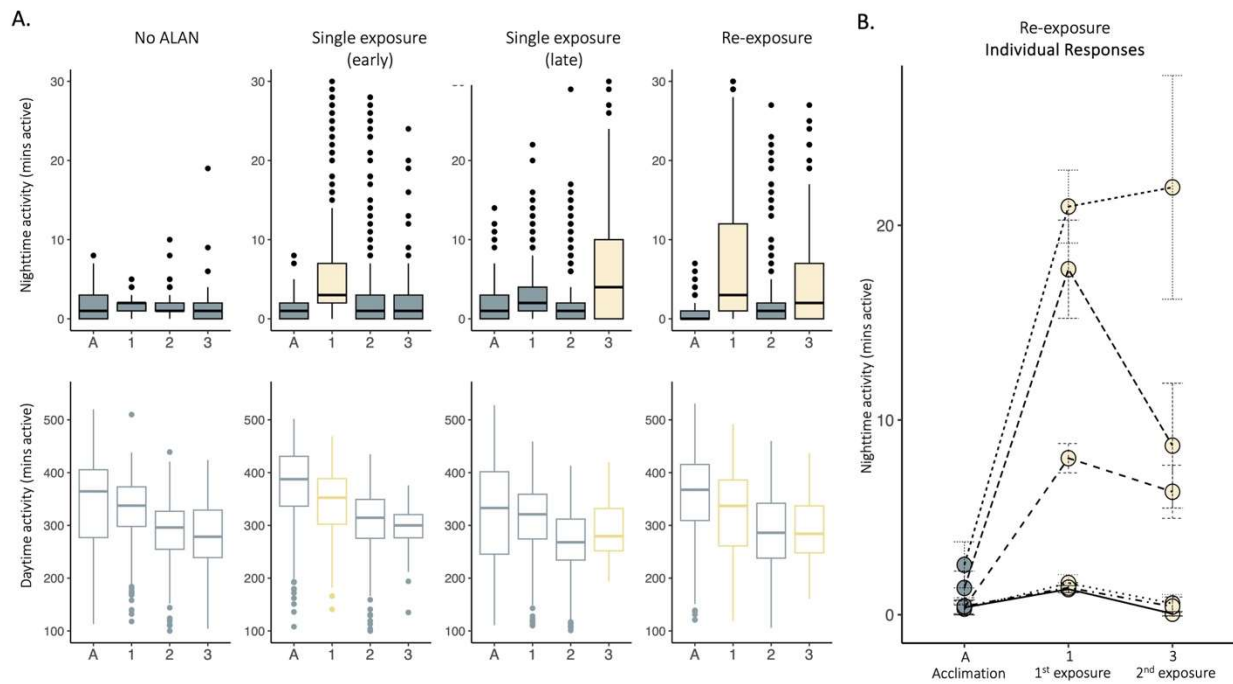

**Figure S2.** Effect of ALAN on activity, shown for treatment groups. **(A).** Boxplot version of Figure 2 in main text, showing raw data. Nighttime (top) and daytime (bottom) activity, measured as total minutes active in the night and/or day, across stages of the experiment. Stage “A” represents acclimation period. Note differences in y axis between daytime and nighttime plots. **(B).** A closer look at individual responses to repeated ALAN exposure. Here we show individual birds ( $n=6$ ) in our experimental group that were exposed to ALAN in both stages 1 and 3. Points represent individual averages (across days of exposure), and error bars show standard errors. Stage 2 here was omitted, to illustrate the change in magnitude of response between first and second exposure (*i.e.*, habituation).

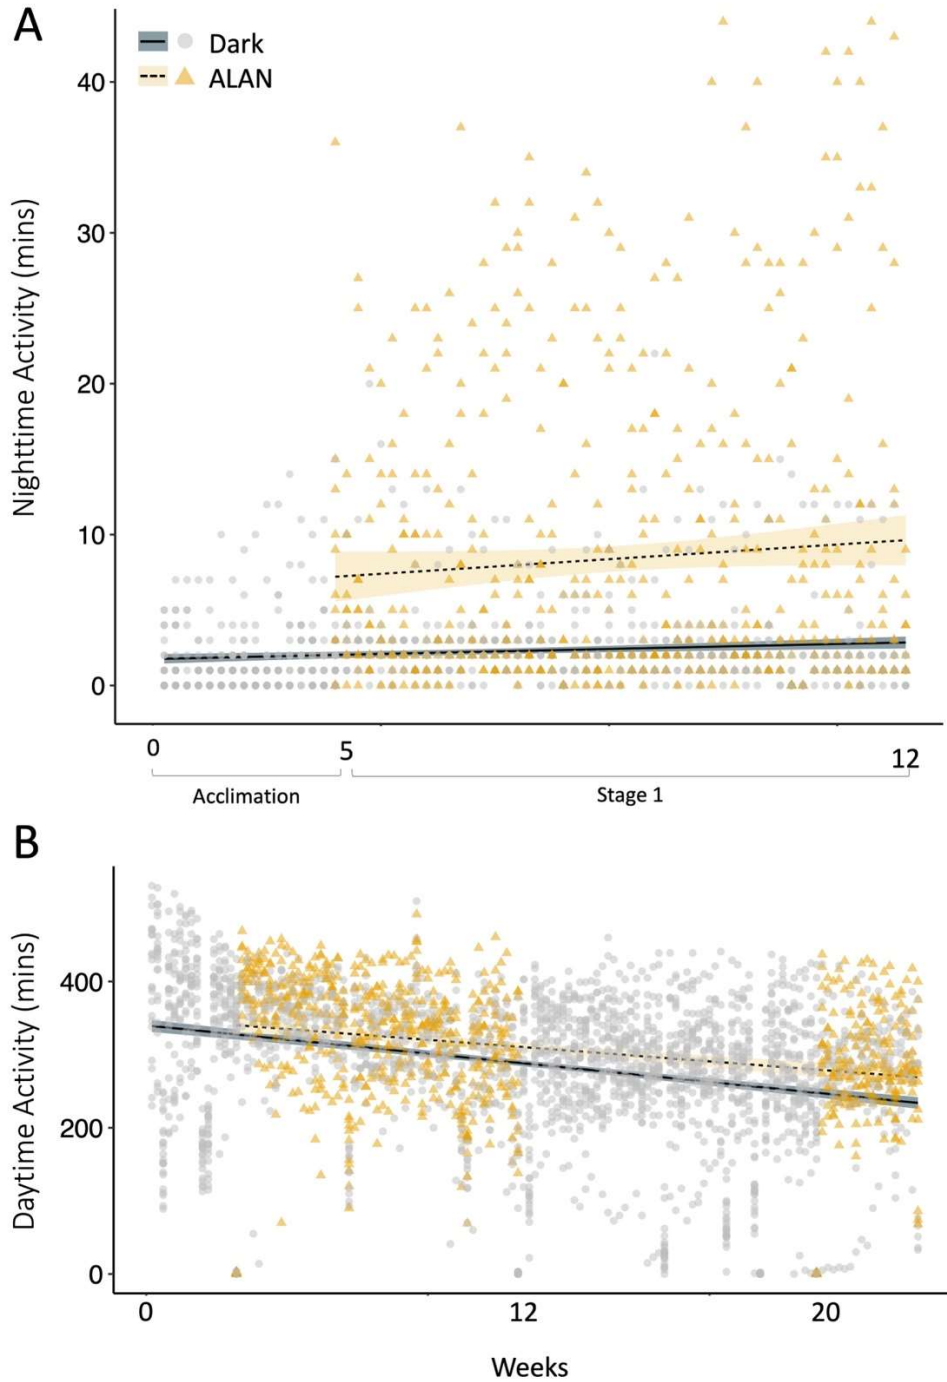

**Figure S3.** Raw activity data over time. **(A).** In stage 1 (8 weeks), we found that for birds under ALAN, nighttime activity increases slightly over time (day), while birds under dark nights showed consistently low nighttime activity. Points represent raw counts of minutes active per night for all birds ( $n=11$  per ALAN and Dark groups). **(B).** Daytime activity decreased across the duration of experiment, regardless of ALAN exposure.

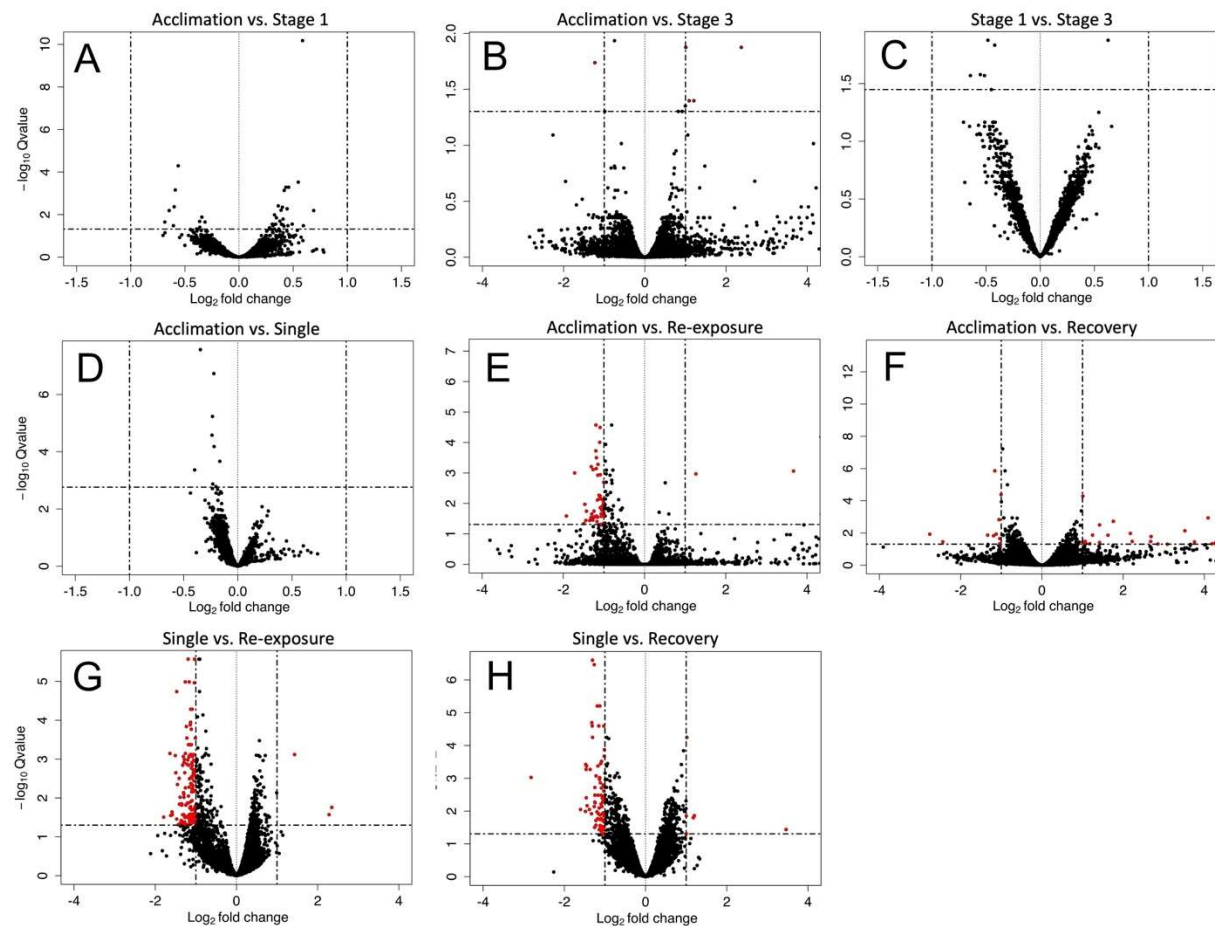

**Figure S4.** Volcano plots representing differentially expressed genes for comparisons between treatment groups. **(A-C)** Pairwise comparisons between timepoints of our control group, maintained in dark-night conditions for the duration of the experiment, performed to validate the impact of ALAN treatment. **(D-H)** Pairwise comparisons of various groups exposed to ALAN (see Figure 1). “Acclimation” represents birds under dark-night conditions, with no previous ALAN exposure. “Single” represents naïve birds during first ALAN exposures. “Recovery” represents birds returned to dark-night conditions, 8 weeks *after* first ALAN exposures. “Re-exposure” represents birds during secondary exposures to ALAN.

### Supplementary References

1. Cawthon RM (2009) Telomere length measurement by a novel monochrome multiplex quantitative PCR method. *Nucleic Acids Res* 37:e21–e21. <https://doi.org/10.1093/nar/gkn1027>



2. Criscuolo F, Bize P, Nasir L, et al (2009) Real-time quantitative PCR assay for measurement of avian telomeres. *J Avian Biol* 40:342–347. <https://doi.org/10.1111/j.1600-048X.2008.04623.x>
3. Morinha F, Magalhães P, Blanco G (2020) Different qPCR master mixes influence telomere primer binding within and between bird species. *J Avian Biol* 51:
4. Zhou Y, Zhou B, Pache L, et al (2019) Metascape provides a biologist-oriented resource for the analysis of systems-level datasets. *Nat Commun* 10:1523. <https://doi.org/10.1038/s41467-019-09234-6>
